# Supplementary material for: Reasons for low influenza vaccination coverage – a cross-sectional survey in Poland
Source: Croat Med J. 2011 Apr;52(2):126–33. doi: 10.3325/cmj.2011.52.126 (PMC3081210; doi:10.3325/cmj.2011.52.126)
Supplement: Supplementary Table 1 [file CroatMedJ_52_s001.pdf]

- 1 ☐ Yes -> go to q. 8  
2 ☐ No

**7. If no, why??**

.....  
.....-> go to q. 14

**8. If yes, why?**

.....  
.....

**9. Were you examined by a physician prior to the vaccination?**

1 ☐ Yes

2 ☐ No

**10. Where did this vaccination take place?**

1 ☐ GP / in primary care

2 ☐ at home

3 ☐ in the workplace

4 ☐ in another place - give details.....

**11. How did you find out about the possibility of vaccination?**

(You can select more than one answer)

1 ☐ from family doctor / primary care

2 ☐ from a specialist

3 ☐ from the pharmacist

4 ☐ from TV

5 ☐ from radio

6 ☐ from the press

7 ☐ from the employer

8 ☐ from friends

9 ☐ other - give details.....

**12. Did any worrying symptoms occur after the vaccination?**

(You can select more than one answer)

1 ☐ soreness at the injection site

2 ☐ fever

3 ☐ malaise

4 ☐ muscle pain

5 ☐ headache

6 ☐ allergic reactions – give details ?.....

7 ☐ other - give details.....

**13. Do you think that the vaccination had an impact on your health?**

1 ☐ yes, positive

2 ☐ yes, negative

<sup>3</sup>☐ I did not notice any change

**14. Have you taken influenza vaccination in the past (not earlier than 12 months ago)?**

<sup>1</sup>☐ Yes

<sup>2</sup>☐ No

**15. Who should by all means receive influenza vaccine?**

- .....
- .....

**16. Who should not receive it?**

- .....

**17. When is the best time to get vaccinated against influenza? (Please give the name of the month or season)**

.....

**18. Do you think that the flu vaccination enhances the immunity against all types of viral infections?**

<sup>1</sup>☐ Yes

<sup>2</sup>☐ No

<sup>3</sup>☐ Difficult to say

**19. Does the flu vaccine protect against the so-called "avian flu"?**

<sup>1</sup>☐ Yes

<sup>2</sup>☐ No

<sup>3</sup>☐ Difficult to say

**20. Are there any other methods for preventing influenza, besides vaccination?**

.....  
.....

**21. How often should the vaccination against influenza be carried out in order to guarantee the maximum effectiveness?**

.....

**22. Do you suffer from any of the chronic conditions listed below? (You can select more than one answer).**

<sup>1</sup>☐ hypertension

<sup>2</sup>☐ coronary artery disease

<sup>3</sup>☐ diabetes

- 4 ☐ asthma, chronic bronchitis, COPD  
5 ☐ cancer  
6 ☐ kidney diseases  
7 ☐ other - please specify.....

**23. Are you taking any medications regularly? If so, please specify.**

.....  
.....

**24. Have you been hospitalised within the last 12 months?**

- 1 ☐ Yes - for what reason? ... ..  
2 ☐ No

**Your data:**

**25. Age** .....years

**26. Gender:**

- 1 ☐ female  
2 ☐ male

**27. Occupation:** .....

**28. What is the population of your place of living?**

- 1 ☐ Below 10 000  
2 ☐ 10 000 -50 000  
3 ☐ 50 000-100 000  
4 ☐ 100 000 -500 000  
5 ☐ More than 500 000

**Thank you.**
